# Supplementary material for: Effects of weight-bearing dance aerobics on lower limb muscle morphology, strength and functional fitness in older women
Source: PeerJ. 2024 Jun 28;12:e17606. doi: 10.7717/peerj.17606 (PMC11216199; doi:10.7717/peerj.17606)
Supplement: Supplemental Information 1 [file peerj-12-17606-s001.xlsx]

## Sheet: DATE
code	group	age	Age of menopause	Age of menopause	lowerlimb	calf	height	weight	2min step	30s CST	chair stand and go	TUG	STCT	2min step2	30s CST2	chair stand and go2	TUG2	STCT 2	AF-Thinck	VI-T	Quadriceps-T	Soleus-T	GM-T	GL-T	GM-length	GL-length	AF-angle	GM-angle	GL-angle	AF-Thinck2	VI-T2	Quadriceps-T2	Soleus-T2	GM-T2	GL-T2	GM-length2	GL-length2	AF-angle2	GM-angle2	GL-angle2	Peak Knee extensors	peak Knee flexors	H:Q	Peak torque/weight Knee extensors	Peak torque/weight Knee flexors	endurance-extensors	endurance-flexors	Peak Knee extensors2	peak Knee flexors2
2021102401	1	71.1	56	15.1	76.6	36	157.3	61.3	117.2	20	2.2	5.835	1.5	122	24	16.5	5.105	3.23	1.4	2.41	3.82	2.5	1.33	1.05	3.19	3.35	10.43	26.97	17.07	1.4	2.29	3.69	2.63	1.85	0.87	3.24	2.03	10.07	32.3	29.67	88.6	49.5	55.9	1.44	0.81	0.713389	0.752834	86.7	51.8
2021102403	1	64.3	50	14.3	78.2	35	155.5	57.2	116	32	-6.2	5.08	14.48	123	30	-6	5.16	19.09	0.79	1.26	2.05	1.04	1.26	0.83	2.91	3.16	4.73	26.37	18.77	1.48	2.2	3.68	2.59	1.49	1.31	2.83	3.18	7.7	31.7	22.27	60.3	33.4	55.4	1.12	0.62	0.84691	0.736979	59.5	36
2021102406	1	68.3	49	19.3	74.5	33.2	150.1	45.2	107	23	16.9	5.4	4	133	28	2	5.635	4.59	1.39	0.79	2.17	1.86	1.33	0.75	2.99	2.4	9.7	28.6	22.13	1.42	1.19	2.61	2.29	1.24	0.99	3.56	3.2	6.57	27.2	18.53	57.4	33.5	58.3	1.27	0.74	0.663793	0.823708	52.3	36.5
2021102408	1	63.3	53	10.3	85.2	38.5	163.8	65.2	134	29	8.4	5.09	7.3	130	31	11	4.73	9.6	1.4	1.23	2.63	1.46	1.39	0.96	2.96	3.29	7.57	27.1	18.03	1.42	1.2	2.62	1.32	1.29	1.2	3.93	3.74	5.13	21.37	21.8	62.3353	35.3529	56.9882	1.09588	0.621176	0.724839	0.845691	72.2	48.3
2021102409	1	58.5	47	11.5	82	37.4	160.3	68	115	21	10.5	5.795	5.27	128	28	11.8	5.995	9.98	1.66	2.11	3.77	4.76	1.88	1.61	4	4.38	12.63	34.73	23.47	1.65	2.28	3.93	3.17	2.11	1.04	4.21	4.19	6.67	29.2	18.73	70.7	45.6	64.6	1.04	0.67	0.753783	0.879342	66	52.3
2021102410	1	66.4	50	16.4	79	35.3	162	61.3	134	26	4	5.315	6.38	128	26	7	5.56	4.17	1.4	1.39	2.79	2.01	1.42	1.63	2.92	4	9.7	33.23	21.63	1.68	1.32	3.01	3.4	1.62	1.45	3.04	3.14	11.07	33.57	27.93	72.1	22.5	31.2	1.18	0.37	0.742347	0.98338	67.3	32.5
2021102411	1	61.9	48	13.9	73.2	31.4	149.1	54.5	174	24	10.5	5.465	2.39	166	34.3	22.4	5.305	5.35	1.56	1.72	3.29	2.6	1.66	1.19	3.98	3.36	13.33	30.57	21.33	1.45	1.4	2.85	1.89	2.28	1.21	3.7	3.45	10.3	40.27	23.87	62.9	29.7	47.2	1.15	0.54	0.76244	0.823834	59.5	44.2
2021102413	1	63.7	56	7.7	80.2	35.7	160.2	55.2	126	32	4	5.33	3.02	143	32	21	5.49	6.73	1.18	1.43	2.61	1.19	1.14	0.91	3.65	3.22	9.13	23.87	21.1	1.77	1.58	3.35	1.87	1.06	1.07	3.79	3.78	13.7	16.8	22.4	56.4	37.2	66	1.02	0.67	0.666667	0.887574	70.9	36.3
2021102415	1	61.3	51	10.3	78.5	34.5	157.1	58	145	30	5	5.74	3.32	145	30	7	4.95	6.48	1.31	1.04	2.35	3.17	1.49	1.26	3.46	3.47	12.67	25.7	19.1	1.32	2.19	3.51	2.34	1.68	1.24	3.74	3.77	8.8	29.03	22.23	69.5	44.5	64	1.2	0.77	0.646593	0.907514	71.8	51.9
2021102416	1	68.9	48	20.9	75.2	33.4	157	66.1	139	22	-7.5	5.705	1.95	120	30	-20	6.13	2.98	1.61	1.37786	2.99	1.94	1.69	1.23	2.9	3.13	11.03	32.63	32.1	1.18	1.57	2.75	2.09	1.58	1.38	3.16	3.03	8.57	33.63	31.67	54.7	23.8	43.5	0.83	0.36	0.70194	0.810169	63.9	30
2021102417	1	66.3	52	14.3	87.2	38.3	165.7	55.2	118	30	-1	6.405	2	124	20	13	6.385	6.18	1.56	1.46	3.02	1.58	1.38	1.1	2.87	3.2	10.2	30.77	21.77	1.02	1.47	2.49	1.29	1.13	1.1	3.39	2.38	7.97	23.13	26.23	74.5	41.9	56.3	1.35	0.76	0.642061	0.674877	76.2	46.4
2021102418	1	67.3	55	12.3	82.4	35.3	155.7	52.1	117	23	-14.2	5.825	2	122	25	0	5.47	3.79	0.96	1.2	2.16	1.49	1.23	1.05	3.05	3.33	10.23	26.83	22	1.23	2.44	3.67	2.46	1.79	1.07	3.51	3.14	13.83	33	24.17	39.8	21.4	53.7	0.76	0.41	0.703093	0.796667	52.3	34.16
2021102441	1	65.3	46	19.3	79.6	33.3	160.1	64	127	28	-2.5	5.975	3.6	125	31	-9	5.51	7.46	1.43	1.22	2.65	1.51	1.48	1.04	4.15	4.13	13.1	26.6	19.6	1.6	1.61	3.22	2.3	1.32	1.4	3.26	3.26	11.4	29.67	30.53	69.4	41.5	59.9	1.08	0.65	0.644231	0.726519	60.1	42
2021102420	1	71.2	50	21.2	77.2	35.7	162.2	67.3	113	27	10	5.975	17.42	102	22	-10	7.02	17.98	1.65	1.42	3.06	1.44	2.07	1.2	4.32	3.86	13.37	32.27	21.83	1.82	1.63	3.45	1.64	1.79	1.21	4.08	3.45	5.53	30.07	28.9	52.3	42.5	81.2	0.78	0.63	0.580517	0.80163	52.4	44.6
2021102425	1	64.6	53	11.6	77	34	152.5	49	105	27	-4	6.315	3	129	32	17	4.875	11.38	1.36	1.47	2.84	1.79	1.65	1.57	3.81	3.75	10.63	25.7	21.47	1.52	1.54	3.06	1.94	1.35	1.19	3.52	4.42	9.2	23.6	18.93	70.9	40.3	56.8	1.45	0.82	0.796919	0.927152	66	48.2
2021102426	1	58.4	55	3.4	72.4	32.9	150.2	65.4	136	26	7.5	5.41	6.15	143	31	20	5.345	28.67	1.78	2.01	3.79	1.5	1.55	1.48	3.95	7.21	7.73	31.73	32.27	1.93	1.86	3.79	4.41	2.49	1.42	3.87	4.29	9.77	31.2	22.17	48.7	24.7	50.7	0.75	0.38	0.904085	1.03415	56.2	32.1
2021102417	1	65.1	50	15.1	81.7	34.7	158.6	53.4	156	25	6	4.98	8	133	33	26	4.69	6.9	1.38	1.23	2.61	2.96	1.76	1.36	3.77	4.79	13.4	28.97	14.73	1.91	1.46	3.37	1.53	1.85	1.01	3.52	3.09	8.67	32.5	23.37	53.4	35.3	66.2	1	0.66	0.910853	0.971098	71.7	34.16
2021102428	1	65.1	44	21.1	80.5	34.4	156.9	48.7	95	32	15.5	5.005	8	140	31	21	4.83	15.57	1.33	1.25	2.58	2.62	1.96	1.46	3.74	3.83	12.27	34.23	25.67	1.71	1.58	3.29	3.49	1.86	1.28	4.58	3.52	11.77	24.2	22.2	58.1	33.7	57.9	1.21	0.7	0.642647	0.839329	57.2	34.6
2021102412	2	62.4	49	13.4	75.7	32.8	154	51.5	99.7	21.3	13.65	5.495	1.72	110	24	2.8	6.17	3.79	1.29	1.42	2.71	1.68	1.58	1.22	3.59	3.39	9.53	27.58	22.69	1.21	1.29	2.5	2.06	1.53	1.39	2.97	3.07	8.53	35.2	30.1	54	22.6	41.8	1.05	0.44	0.712887	0.862069	43	23
2021103002	2	70.1	55	15.1	76.1	35.3	154.4	61.5	94	29	30	5.14	9.03	119	30	32.5	5.15	24.5	1.49667	1.52333	3.02	2.59	1.91333	1.30333	3.55667	3.75667	7.76667	30.2	20.3	1.64333	1.33333	2.97667	1.54333	1.67667	1.14	3.54667	3.27333	10.5	33.6333	22.4333	62.6	45.3	72.4	1.02	0.74	0.756098	0.866667	60.8	41.9
2021103003	2	70.9	48	22.9	75.6	32.7	156.2	56.7	111	23	20.1	5.93	5.03	96	23	22.2	6.405	1.5	0.786667	1.11	1.89667	1.63667	1.48667	1.24333	4.34667	4.47667	11.3667	28.8333	17.5	1.14	1.38667	2.52667	1.55667	1.72	1.34	4.20333	4.80667	9.86667	31.3	19.4667	66.2	16.3	24.6	1.17	0.29	0.840726	0.918803	68.9	35.4
2021103004	2	69.8	50	19.8	79.1	36	154.1	57.3	86	18	30.3	5.64	5.28	89	21	30.5	6.11	3.04	0.983333	1.33667	2.32	0.843333	1.22333	0.8	4.06667	3.31	13.8333	20.6667	15.7333	1.31333	1.71667	3.03	2.34	1.42667	0.63	3.64	3.85667	6.56667	27.1	13.2	56.2769	27.1692	48.4308	1.00231	0.486228	0.754119	0.838728	65.3	31.8
2021103005	2	62.4	50	12.4	78	35.7	155	67.4	94	28	6.4	5.97	5.12	117	29	2.5	7.08	6.37	1.45	1.41	2.86	1.25667	1.52	1.56667	2.81	2.87667	11.1667	20.2	19.7333	1.66333	1.40667	3.07	2.79333	1.57667	1.11	3.40667	2.78333	9.56667	19.1	25.1333	43.4	17.4	40.1	0.64	0.26	0.775629	0.736264	48.3	26.8
2021103009	2	63.7	50	13.7	77.2	33.7	160.2	50.8	110	29	37.5	5.33	7.47	119	30	26	5.22	14.31	1.4	1.55333	2.95333	1.39	1.50667	1.75333	3.33667	4.15	9.26667	28.3333	28.0333	1.03333	1.17667	2.21	2.46667	1.53667	1.51	4.28667	3.68	8.76667	27	28.9	50.9	34.6	67.9	1	0.68	0.821643	0.852349	44.7	34.7
2021103011	2	68.3	50	18.3	78.9	35.4	156.6	47.8	100	15	-5.2	6.01	6.1	112	27	0.5	6.64	12.23	1.27	1.44667	2.71667	1.53667	1.9	1.00667	4.02333	3.15	11.8	25.9	21.6	1.20667	1.32	2.52667	1.83	1.73	1.18	4.32	3.54	12.1667	27.4	19.1667	45	29	64.6	0.94	0.61	0.852998	0.682216	53.5	39.6
2021103101	2	65.2	53	12.2	80.3	35.5	156.2	56.8	119	24	0.4	6.765	2.23	136	23	0.5	5.415	3.26	1.3	1.16	2.45	1.46	1.75	1.33	3.97	2.96	9.03	27.33	25.63	1.08	0.89	1.98	1.4	1.63	1.07	3.29	3.55	5.77	30.53	18.6	46.4	25.2	54.3	0.82	0.44	0.969194	0.965066	59.2	21.7
2021103106	2	70	57	13	84	37.3	164.3	57.4	127	23	29.2	5.19	4.03	127	31	20	4.885	3.35	1.68	2.09	3.77	2.13	1.46	1.31	3.59	3.55	8.77	27.27	25.9	1.72	1.47	3.19	2.32	1.66	1.26	4.93	3.35	10.73	23.87	21.93	65.6	27.1	41.4	1.14	0.47	0.701087	1.02985	71.2	23.1
2021103108	2	64.9	53	11.9	82	38	161.6	64.7	94	15	10.3	5.515	3.89	102	17	8.2	5.825	5.04	0.91	0.92	1.83	1.43	1.89	1.07	3.72	3.36	6.37	37.97	27.57	1.12	0.89	2.01	1.87	2.04	1.25	3.32	3.44	6.43	41.57	27.4	50.9	31.3	61.5	0.79	0.48	0.722749	0.822878	50.5	24.2
2021103109	2	66.6	53	13.6	81.7	36.3	162.6	56.6	61	16	1	6.045	3.78	96	17	-4.2	6.24	4.35	1.46	2.03	3.49	1.42	1.13	0.8	2.24	2.67	14.17	29.13	20.5	1.4	0.93	2.33	1.12	1.26	0.79	3.63	2.93	12.23	25.93	17.6	56.2769	27.1692	48.4308	1.00231	0.486228	0.754119	0.838728	55.5	19.8
2021103110	2	69.4	50	19.4	83.3	36.8	164.7	61.6	100	20	-5.2	5.935	3.48	122	20	-5	5.345	1.4	1.39	1.19	2.58	1.52	1.69	0.67	3.46	3.1	7.8	25.83	21.17	1.51	1.16	2.68	1.53	1.81	0.99	3.84	3.93	8.53	27.4	21.03	72.4	31	40	1.17	0.500967	0.589552	0.72191	65.7	15.1
2021103112	2	71.1	51	20.1	76.8	33.3	157.5	49.8	115	31	17.1	5.52	4.16	130	35	21	5.94	4.53	1.28	1.14	2.42	1.86	1.69	1.22	3.85	2.94	7.5	28.5	27.5	1.68	1.2	2.88	1.12	1.05	1.23	2.57	2.86	5.63	26.87	29.57	71.2	38.5	54.1	1.43	0.77	0.627706	0.805556	66.3	35.5
2021103113	2	72.4	48	24.4	88.3	40.2	165.4	60.7	81	11	11.2	6.59	16.29	86	13	5	5.785	9.67	0.72	1.01	1.73	2.13	1.42	0.92	3.84	2.72	8.43	22.33	22	1.46	1.11	2.57	1.37	1.55	1.24	4.32	3.59	5.4	22.5	21.23	54	22.6	41.8	1.05	0.44	0.700201	0.889831	27	24.1
2021103114	2	67.8	50	17.8	73.4	32.4	152.1	60.6	104	16	8	6.055	6.33	113	28	8.5	5.155	7.79	1.87	1.98	3.85	2.26	1.49	2.14	3.41	4.37	6.2	33.67	24.5	1.93	1.24	3.17	2.26	1.56	0.95	3.8	3.42	8.93	29.47	22.27	49	12.3	25.1	0.81	0.2	0.733075	0.75	54.8	38.6
[truncated: 30 more columns]
